# Supplementary figures and images for: The role of hippocampal theta oscillations in working memory impairment in multiple sclerosis
Source: PubMed Central journal article supplement — Hum Brain Mapp. 2020 Nov 28;42(5):1376–90. doi: 10.1002/hbm.25299 (PMC7927306; doi:10.1002/hbm.25299), 2020-11-28

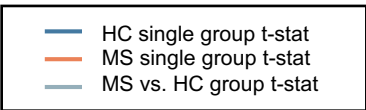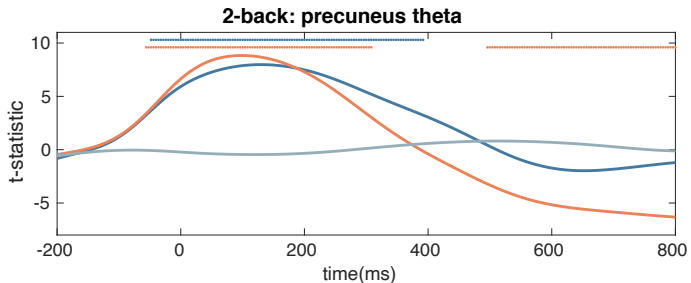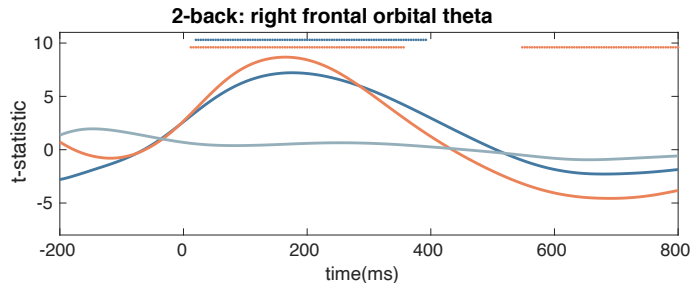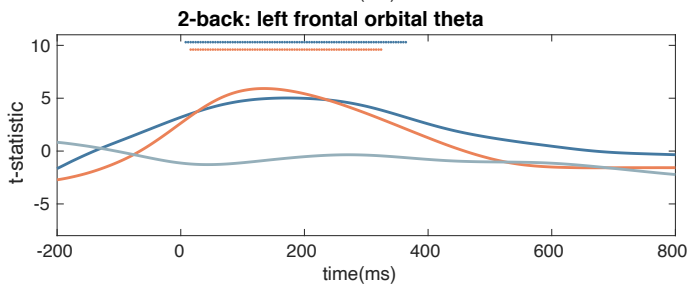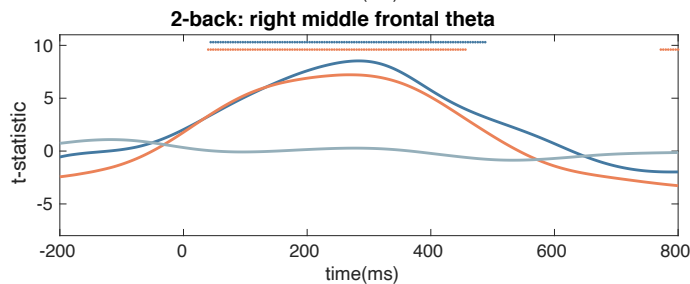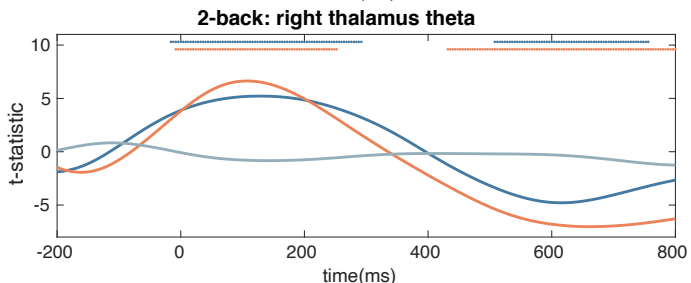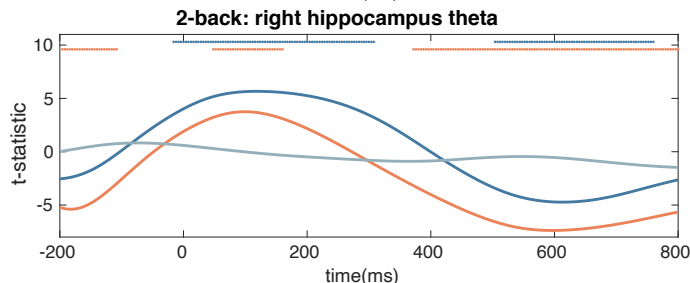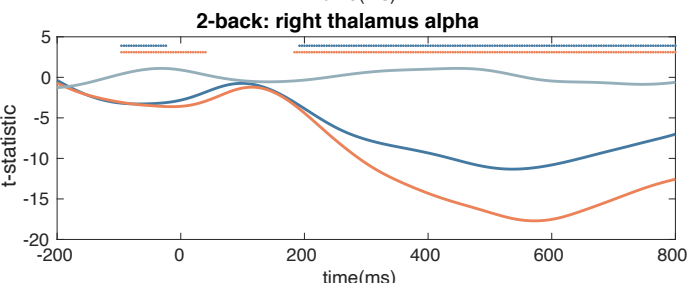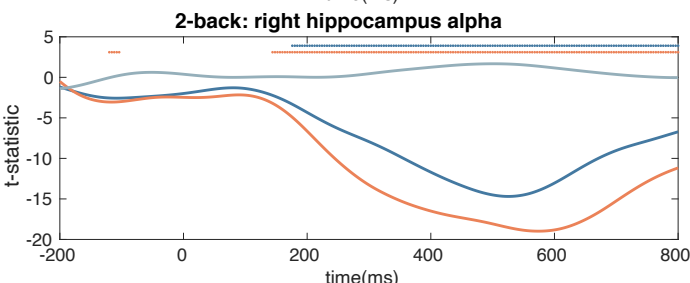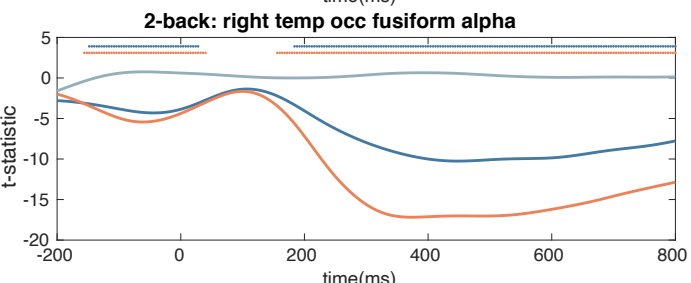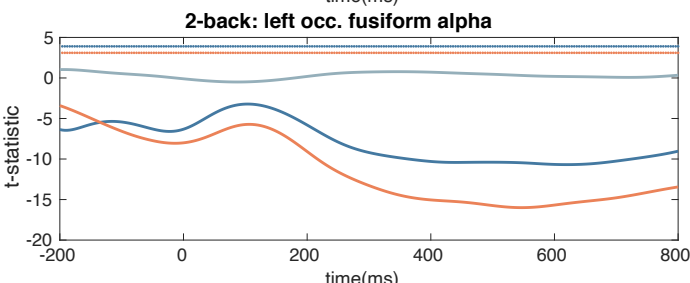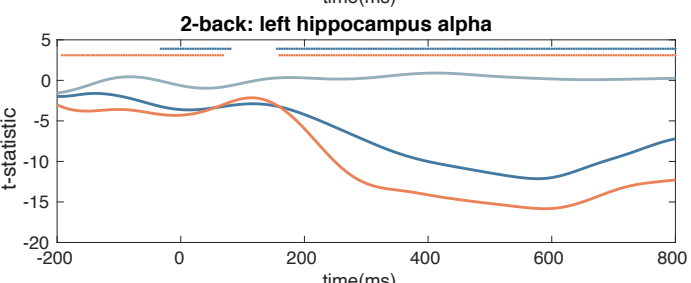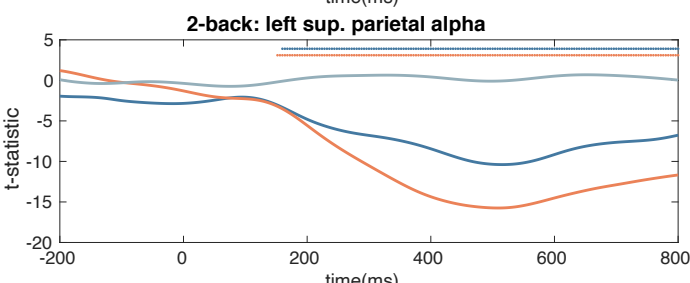

Supplement: HBM-42-1376-s002.pdf [file HBM-42-1376-s002.pdf]

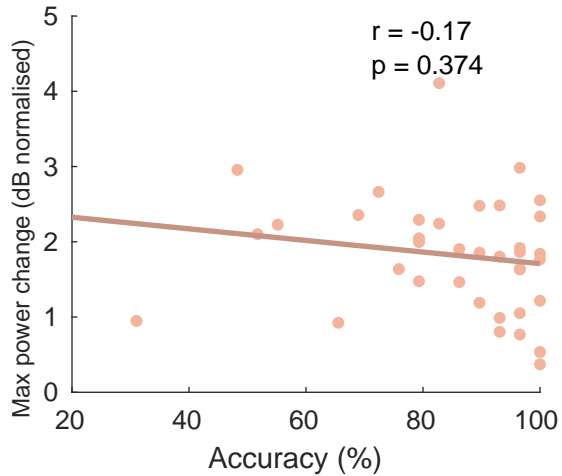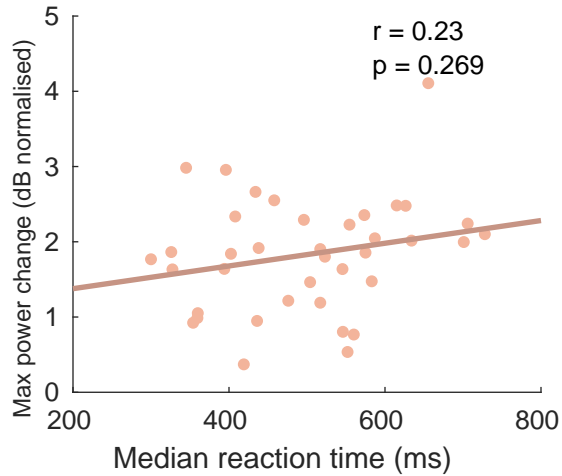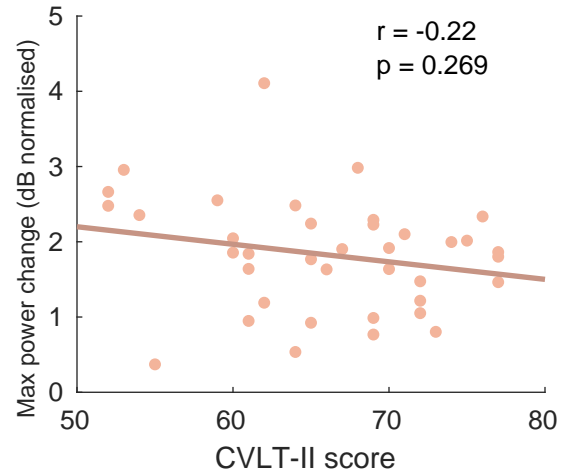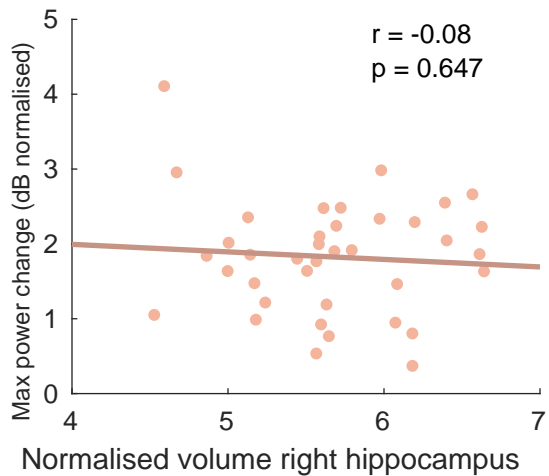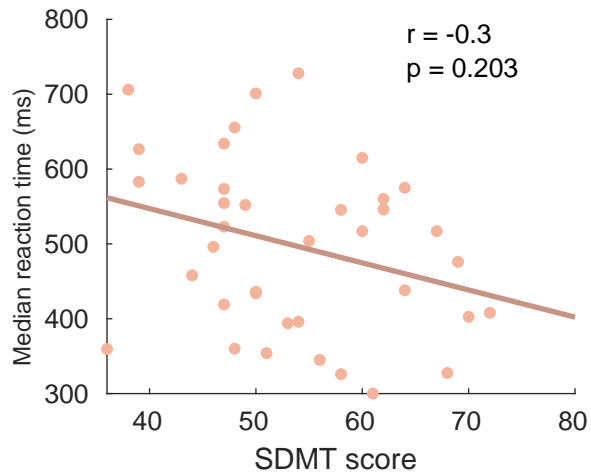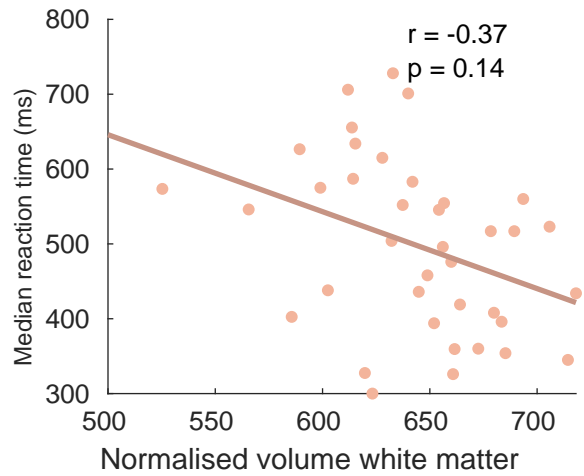

Supplement: HBM-42-1376-s003.pdf [file HBM-42-1376-s003.pdf]

### Common cause confounder?

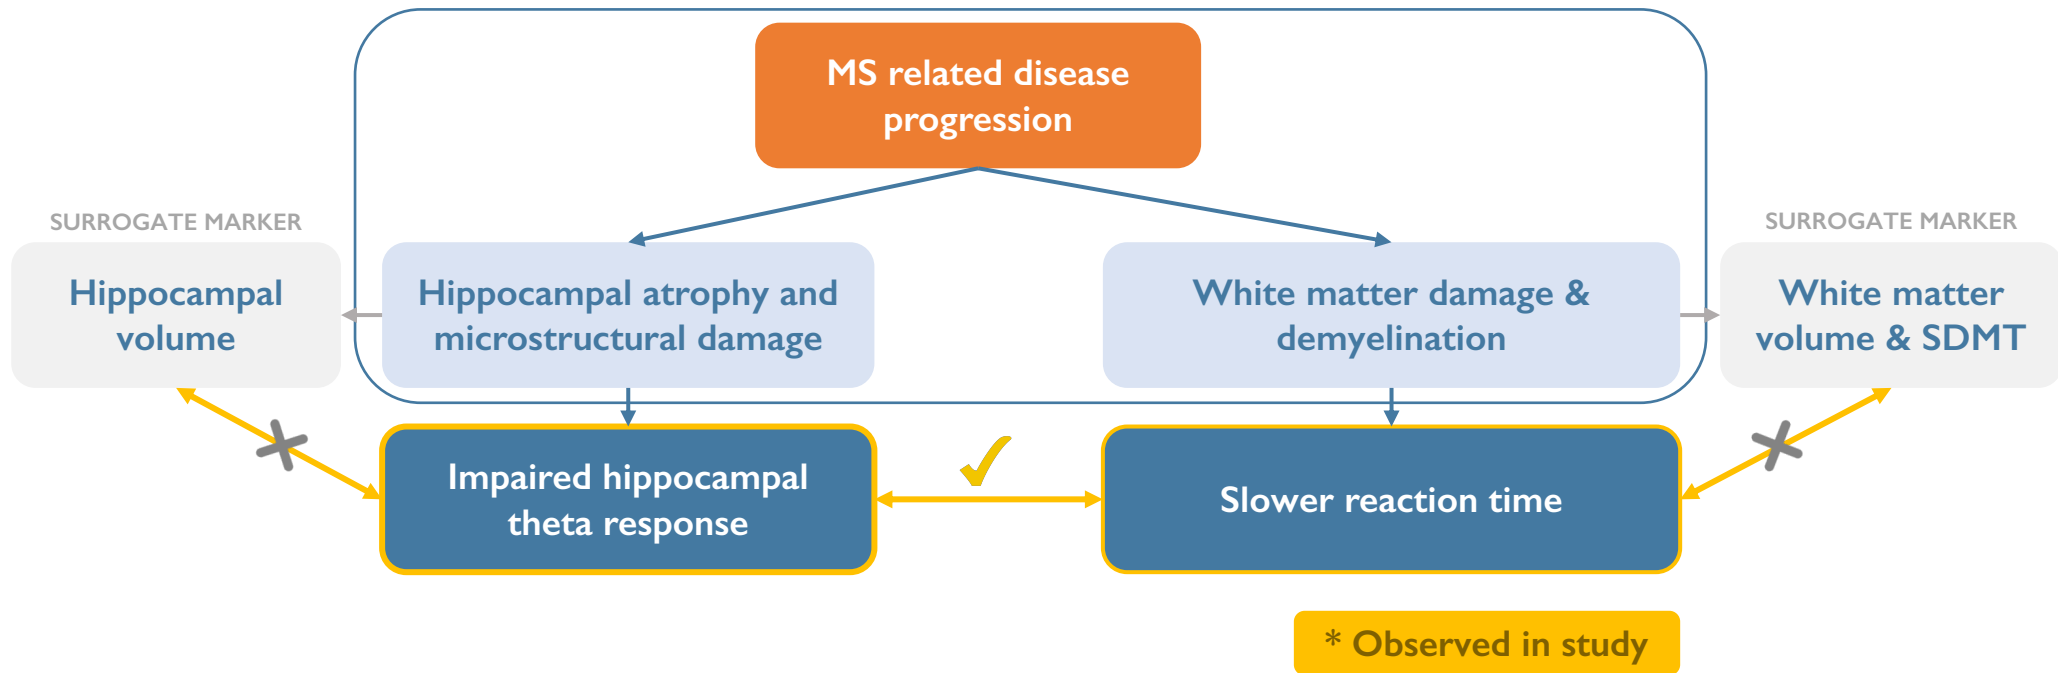

Supplement: HBM-42-1376-s004.pdf [file HBM-42-1376-s004.pdf]
